# Supplementary material
Source: PubMed Central journal article supplement (PMC3825029)
Supplement: NIHMS462755-supplement-1.pdf [file NIHMS462755-supplement-1.pdf]

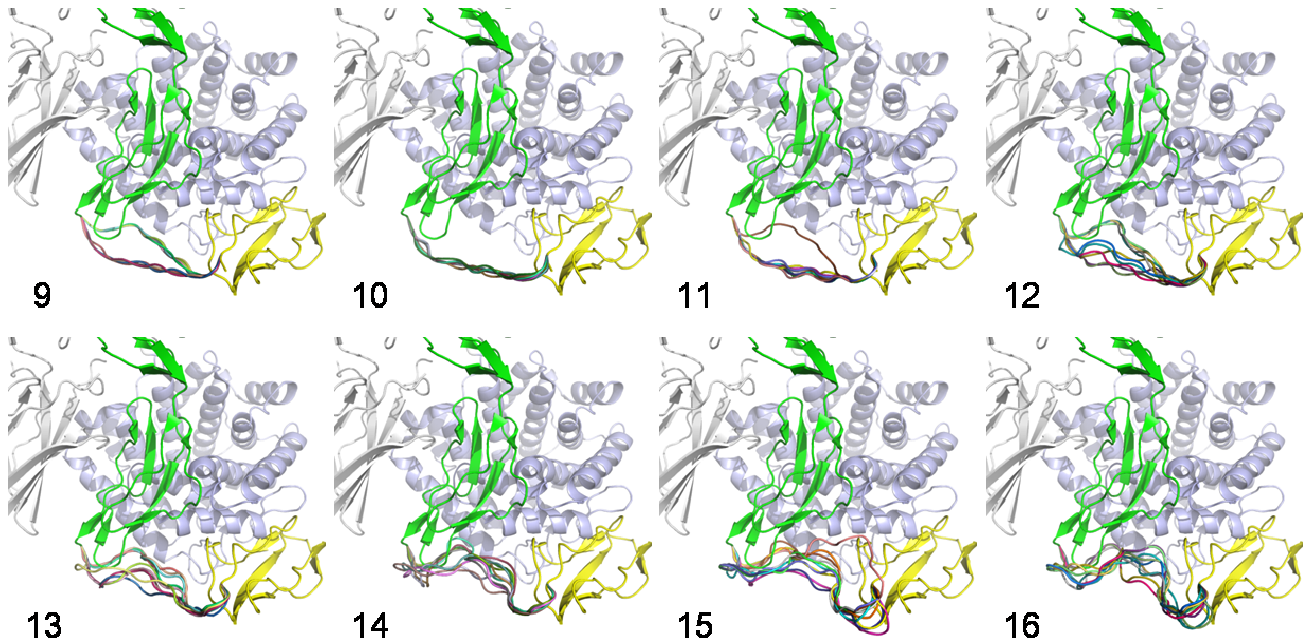

**Supplementary Figure 1.** Sampled conformations of linkers containing 9 to 16 glycines. Ten conformations are randomly picked from all 80 conformations. The green cartoon representation corresponds to domains CCP 3 (partially) and CCP 4 of FH. The yellow representation corresponds to FH CCP 19. The TED domain of C3b is shown in grey. The increased conformation variance for linkers containing more than 12 glycines indicates a fully relaxed state of linkers when CCPs 1-4 and 19-20 are simultaneously bound to C3b.
